# Supplementary material for: Colorectal Cancer Bioengineered Microtissues as a Model to Replicate Tumor-ECM Crosstalk and Assess Drug Delivery Systems In Vitro
Source: MDPI journal article supplement (doi:10.3390/ijms24065678), 2023-03-16
Supplement: s1 [file s1]

Supplementary figures

# Colorectal cancer bioengineered microtissues as model to replicate tumor-ECM cross-talk and assess drug delivery systems in vitro

Alessia La Rocca <sup>1,2</sup>, Vincenza De Gregorio <sup>3,4</sup>, Giorgia Imparato <sup>1,3,5,\*</sup>, Elena Lagreca <sup>1,5</sup>, Raffaele Vecchione <sup>1</sup>, Paolo Antonio Netti <sup>1,3,5</sup>

<sup>1</sup> Center for Advanced Biomaterials for Health Care (CABHC), Istituto Italiano di Tecnologia, 80125 Napoli, Italy

<sup>2</sup> San Raffaele Diabetes Research Institute, IRCCS San Raffaele Scientific Institute, 20132 Milan, Italy

<sup>3</sup> Interdisciplinary Research Centre on Biomaterials (CRIB), University of Naples Federico II, 80125 Naples, Italy

<sup>4</sup> Department of Biology, University of Naples Federico II, Complesso Universitario Monte S. Angelo, 80126 Naples, Italy

<sup>5</sup> Department of Chemical Materials and Industrial Production (DICMaPI), University of Naples Federico II, 80125 Naples, Italy

\* Correspondence: [giorgia.imparato@iit.it](mailto:giorgia.imparato@iit.it) (G.I.);

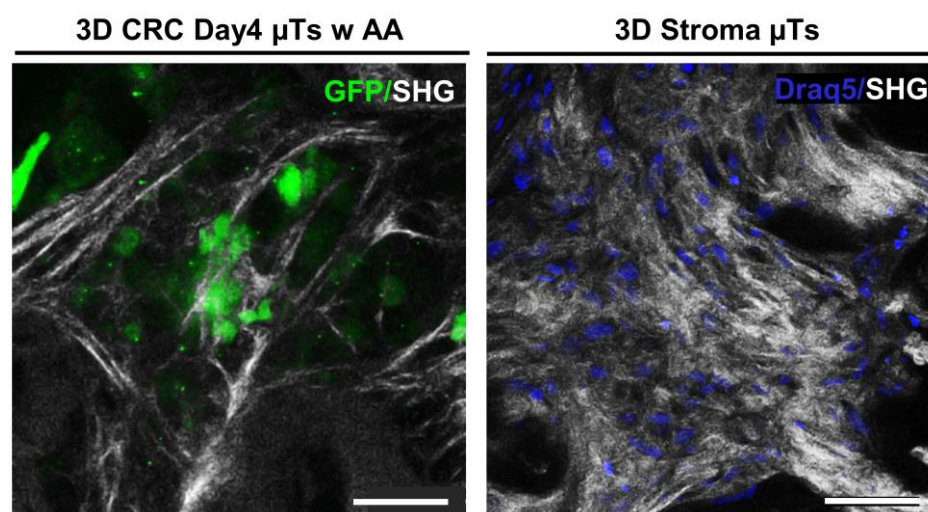

**Figure S1.** High magnification of different organization and structure of auto-produced ECM in 3D CRC Day4  $\mu$ Ts and 3D Stroma  $\mu$ Ts; scale bar 40  $\mu$ m.

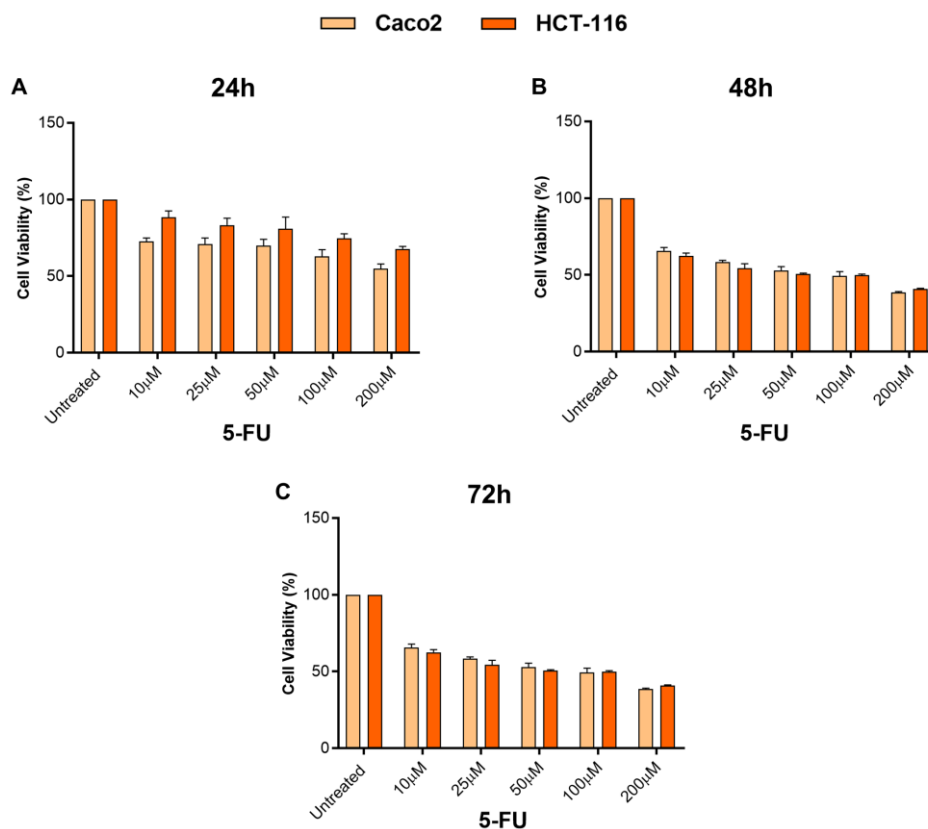

**Figure S2.** Absence of selective cytotoxic effect of 5-FU between less invasive colon cancer cells (Caco2) and more invasive cancer cells (HCT-116) in 2D *in vitro* cell cultures. Caco2 and HCT-116 were treated with different 5-FU concentrations and MTT analyses were carried out after 24 h, 48 h and 72 h of treatments. All the experiments were performed in triplicate ( $n = 3$ ), values represent the mean and mean-standard error.

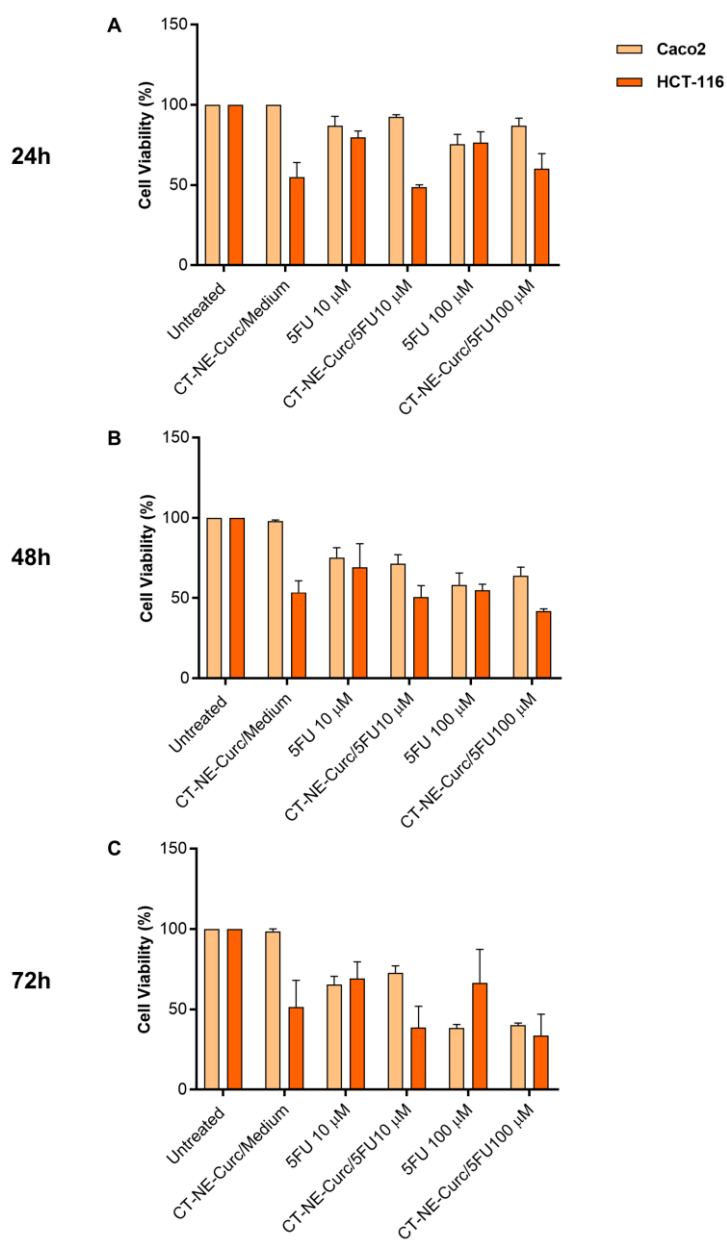

**Figure S3.** Synergistic effects of CT-NE-Curc and 5-FU 10 µM and 100 µM in 2D *in vitro* colon cancer cell cultures. Caco2 and HCT-116 cells were pre-treated with CT-NE-Curc for 2 h and then treated with 5-FU 10 µM and 100 µM. MTT analyses were carried out after 24 h, 48 h and 72 h of treatments. All the experiments were performed in triplicate (n = 3), values represent the mean and mean-standard error.

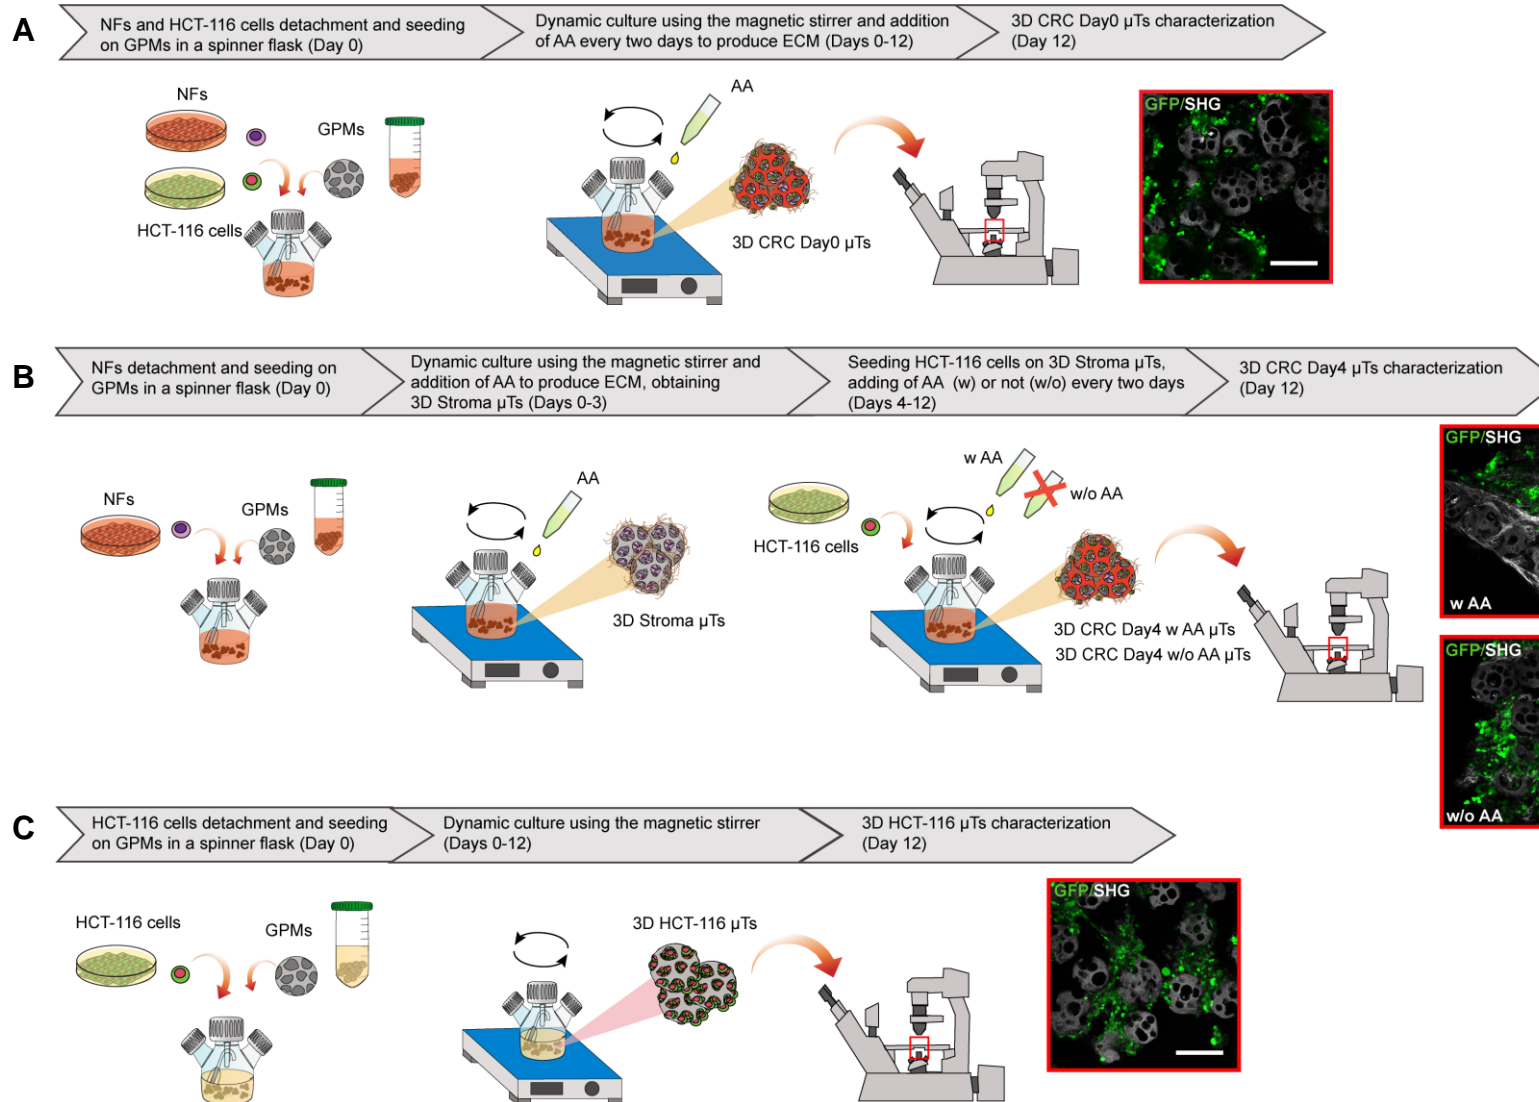

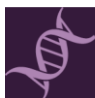

**Figure S4:** A schematic diagram of the sequence of steps for 3D  $\mu$ Ts fabrication. (A) 3D CRC Day0  $\mu$ Ts production; (B) 3D Stroma  $\mu$ Ts and 3D CRC Day 4 w or w/o  $\mu$ Ts production; (C) 3D HCT-116  $\mu$ Ts production. Normal fibroblasts (NFs); Gelatin porous microbeads (GPMs); Ascorbic Acid (AA); 3D CRC Day4  $\mu$ Ts with Ascorbic Acid (w A) and 3D CRC Day4 without Ascorbic acid (w/o AA); Green Fluorescent Protein (GFP); Second Harmonic Generation (SHG).
